1

2

3       Personalized expression of bitter ‘taste’ receptors in human skin

4

5

6       Lauren Shaw,<sup>1</sup> Corrine Mansfield,<sup>1</sup> Lauren Colquitt,<sup>1</sup> Cailu Lin,<sup>1</sup> Jaime  
7               Ferreira,<sup>2</sup> Jaime Emmetsberger,<sup>2</sup> and Danielle R. Reed<sup>1\*</sup>

8

9

10   <sup>1</sup>Monell Chemical Senses Center, Philadelphia, PA, USA

11   <sup>2</sup>Estee Lauder Companies, Inc., Melville, NY, USA

12

13   \* Corresponding author:

14   reed@monell.org (DRR)

15

## 16 **Abstract**

17           The integumentary (i.e., skin) and gustatory systems both function to protect the human  
18 body and are a first point of contact with poisons and pathogens. These systems may share a  
19 similar protective mechanism because both human taste and skin cells express mRNA for bitter  
20 ‘taste’ receptors (*TAS2Rs*). Here, we used gene-specific methods to measure mRNA from all  
21 known bitter receptor genes in adult human skin from freshly biopsied samples and from samples  
22 collected at autopsy from the Genotype-Tissue Expression project. Human skin expressed some  
23 but not all *TAS2Rs*, and for those that were expressed, the relative amounts differed markedly  
24 among individuals. For some *TAS2Rs*, mRNA abundance was related to sun exposure (*TAS2R14*,  
25 *TAS2R30*, *TAS2R42*, and *TAS2R60*), sex (*TAS2R3*, *TAS2R4*, *TAS2R8*, *TAS2R9*, *TAS2R14*, and  
26 *TAS2R60*), and age (*TAS2R5*), although these effects were not large. These findings contribute to  
27 our understanding of extraoral expression of chemosensory receptors.

28

## 29 Introduction

30 Humans have at least five widely accepted types of taste receptors: salty, sour, sweet, bitter,  
31 and umami. The bitter receptors, called taste receptor type 2 (*T2R*), are G protein-coupled  
32 receptors that protect humans from ingesting toxins [1]. In the gustatory pathway when bitter  
33 compounds bind to a *T2R* protein on a taste cell, a conformational change of the protein elicits a  
34 signaling cascade. This indirectly induces the release of intracellular calcium, which leads to  
35 depolarization and neurotransmitter release, thereby activating sensory neurons that send signals  
36 to the central nervous system for bitter perception [2]. Humans have 25 bitter receptors, the *T2R*  
37 proteins, that are encoded by the *TAS2R* genes located on chromosomes 5, 7, and 12 (Fig 1).

38 **Figure 1: Bitter receptor locations in the human genome.** The location of *TAS2R* genes on  
39 human chromosomes 5, 7, and 12 marked by red bars.

40 Recently, scientists have identified bitter receptors in locations of the body other than the  
41 taste cells. This expression and activation of extragustatory *T2Rs* will not lead to taste  
42 perception, but instead will elicit distinct cell-type-specific physiological responses. The results  
43 of several studies have demonstrated that the extraoral expression of *T2Rs* is involved in or  
44 regulate important biological processes germane to the nature of the tissue in which they reside.  
45 Bitter receptors have been implicated in the relaxation of smooth muscle, vasoconstriction, gut  
46 motility, bronchodilation, nutrient sensing, insulin release, and the release of the antimicrobial  
47 peptide,  $\beta$ -defensin [3-7]. As an example, studies performed by Lee *et al.* demonstrated that  
48 susceptibility to upper respiratory infection depends on an inborn genotype within one of these

49 bitter receptor genes (*TAS2R38*). Gram-negative bacteria secrete a quorum-sensing molecule that  
50 is an agonist of the T2R38 receptor. People with non-functional alleles of this receptor are more  
51 susceptible to sinonasal infection because of impairments in this bactericidal pathway [8]. The  
52 broader implications of this result are that bitter receptors expressed in extraoral areas may be  
53 involved in innate immunity.

54 Building on this observation, we conducted a study to assess the gene expression patterns of  
55 all 25 *TAS2R* genes in skin, since it is a barrier organ and a first line of defense against invading  
56 pathogens, presenting both innate and adaptive immune functions. In addition, at least one cell  
57 type in human skin (keratinocytes) expresses olfactory receptors, which are similar to bitter taste  
58 receptors [9]. Other investigators have measured *TAS2R* mRNA expression in skin with  
59 conflicting results, perhaps owing to lack of appropriate controls against genomic DNA  
60 contamination [10, 11]. Here, we combine results from a smaller biopsy study using quantitative  
61 PCR (qPCR) and appropriate controls with a larger autopsy study using an RNA-seq method to  
62 get a more complete understanding of *TAS2R* mRNA expression patterns in human skin.

## 63 **Results**

### 64 **Sample integrity**

65 RNA and DNA were extracted from 15 whole skin samples provided by the University of  
66 Pennsylvania Department of Dermatology (Table 1) and from one fungiform taste papilla (FP)  
67 biopsy obtained from a separate donor as a representative of taste tissue. One sample (004) did  
68 not produce viable RNA (RNA integrity number equivalents = 1.0) and was eliminated from the

69 study. Using the remaining RNA samples, cDNA was synthesized and tested for the presence of  
70 unwanted genomic DNA using the Abelson 1 (*ABL1*) gene [12]. This is a necessary step since  
71 the *TAS2R* protein-coding sequences are within single exons, and *TAS2R* primers cannot be  
72 designed to differentiate between genomic DNA and cDNA. Based on the results, three of the  
73 samples (005, 006, and 007) were unlikely to contain cDNA because they did not express this  
74 gene, and two (009 and 014) had residual genomic DNA after a second DNase treatment (S1  
75 Fig.). These five samples were eliminated from the study.

76 **Table 1. Subject characteristics.**

**A)**

| <i>Sample No.</i> | <i>Age</i> | <i>Gender</i> | <i>Site</i>          |
|-------------------|------------|---------------|----------------------|
| 001               | 64         | F             | Face                 |
| 002               | 81         | M             | Cheek                |
| 003               | 52         | M             | Scalp                |
| 004 <sup>#</sup>  | 75         | M             | Neck                 |
| 005 <sup>#</sup>  | 62         | M             | Left temple          |
| 006 <sup>#</sup>  | 63         | F             | Right cheek          |
| 007 <sup>#</sup>  | 46         | M             | Left temple          |
| 008               | 70         | M             | Right cheek          |
| 009 <sup>#</sup>  | 54         | M             | Nose                 |
| 010               | 87         | M             | Leg                  |
| 011               | 58         | F             | Left posterior thigh |
| 012               | 56         | M             | Right cheek          |
| 013               | 52         | M             | Right leg            |
| 014 <sup>#</sup>  | 55         | F             | Left supraclavicular |
| 015               | 55         | M             | Eyebrow              |

**B)**

| <i>Skin sample type</i>    | <i>N</i><br><i>subjects</i> |
|----------------------------|-----------------------------|
| Sun-exposed<br>(lower leg) | 209                         |
| Not sun-exposed            | 107                         |

(suprapubic area)

|       |     |
|-------|-----|
| Both  | 299 |
| Total | 914 |

C)

| <i>Characteristic</i> | <i>Group</i> | <i>N subjects</i>               |                        |
|-----------------------|--------------|---------------------------------|------------------------|
|                       |              | <i>Penn Dermatology (N = 9)</i> | <i>GTEEx (N = 914)</i> |
| <b>Age</b>            | 20-29        | 0                               | 68                     |
|                       | 30-39        | 0                               | 70                     |
|                       | 40-49        | 0                               | 150                    |
|                       | 50-59        | 5                               | 300                    |
|                       | 60+          | 4                               | 326                    |
| <b>Sex</b>            | F            | 2                               | 311                    |
|                       | M            | 7                               | 603                    |
| <b>Sun Exposure</b>   | Yes          | 9                               | 508                    |
|                       | No           | 0                               | 406                    |

77 A) Individual information for skin samples obtained from Penn Dermatology. <sup>#</sup>Samples that did  
78 not pass our sample integrity tests. B) Information about post-mortem tissue samples donated by  
79 individuals from the Genotype-Tissue Expression project (GTEx) data set. C) Summary of  
80 demographics of nine viable skin biopsies obtained from Penn Dermatology and of 914 skin  
81 biopsies from the GTEx data set. All samples from Penn Dermatology were presumed to be sun-  
82 exposed based on the physical location of the sample, e.g., cheek; likewise, we assumed for the  
83 GTEx samples that those from the lower leg were sun-exposed whereas those from the skin of  
84 the suprapubic region were not.

85 Samples obtained from Penn Dermatology after Mohs surgery vary in size because the  
86 procedure requires surgeons to continue removing tissue until all cancerous cells are gone and  
87 only healthy tissue remains. The depth of the surgery therefore varies by individual. The samples  
88 obtained in this study consist of healthy skin that was removed to properly close the wound at the

89 end of the procedure. Thus, each biopsy sample is unique [13]. To characterize the skin layers  
90 and cell types represented in the biopsy samples from Penn Dermatology, qPCR was performed  
91 for seven skin-layer- and cell-type-specific markers, standardized to *GAPDH*. As expected,  
92 biopsy samples differed in the relative abundance of cell-layer markers (Fig 2)[14, 15].

93 **Figure 2: Quantification of skin-specific gene expression—qPCR results from cDNA of FP**  
94 **and skin samples.** Data are from amplification of skin-specific markers characterized in the  
95 table [14, 15]. Data from all markers are represented in order of skin layer for each individual  
96 biopsy, with the top of the epidermis (*CDSN*) as the lightest bar section and the bottom of the  
97 dermis (*COL1A1*) as the darkest bar section. Results were standardized to the housekeeping gene  
98 *GAPDH* and expressed as  $2^{\Delta\Delta Ct}$ .

## 99 **PCR amplification**

100 To investigate whether bitter taste receptor mRNA is expressed in human skin, PCR  
101 experiments were performed with two technical replicates for each of the 25 *TAS2R* genes (S2–  
102 S26 Figs), which were compared against two positive controls: (a) genomic DNA from skin and  
103 (b) fungiform papillae cDNA. Of the 25 *TAS2R* genes, only three showed no expression  
104 (*TAS2R1*, 7, and 8), 19 showed variable expression (*TAS2R3*, 4, 5, 9, 13, 14, 16, 20, 31, 38–43,  
105 45, 46, 50, and 60), and three showed universal expression (*TAS2R10*, 19, and 30) (Fig 3). The  
106 genomic DNA positive controls were amplified in every case; however there was variability in  
107 *TAS2R* expression in the FP, suggesting that *TAS2Rs* are expressed at low levels even in taste  
108 tissue. This low abundance may explain the variability of expression between technical  
109 replicates, as shown in S2–S26 Figs and summarized by the yellow cells in Fig 3. PCR

110 experiments were also performed for *GNAT3*, a gene encoding for the  $\alpha$ -subunit of the taste-  
 111 associated G protein gustducin, and keratin 10 (*KRT10*), a positive epithelial marker (Fig 3 and  
 112 S27–S28 Figs). *GNAT3* was detected in taste tissue, as expected, and in four skin samples (002,  
 113 003, 008, and 015), suggesting some similarity between the pathway elicited in skin and the  
 114 initial steps of the gustatory pathway. As anticipated, *KRT10* was detected in FP and all skin  
 115 samples. All primers are listed in Table 2.

116 **Figure 3: Results from two rounds of PCR.** Each column is labeled by a gene, with members  
 117 of the *TAS2R* family in the order of location on human chromosomes. Each row is labeled by a  
 118 sample ID, where 'gDNA' represents genomic DNA (positive control), 'FP' represents taste  
 119 tissue, and 'W' represents water (a negative control). Green box, bands in both experiments;  
 120 yellow box, bands in one experiment; red box, no bands. \* indicates that there was only one PCR  
 121 experiment for that gene.

122 **Table 2: Primer sequences.**

| <i>Primer</i> | <i>Sequences (5'-3')</i>                                                       | <i>DNA (bp)</i> | <i>RNA (bp)</i> |
|---------------|--------------------------------------------------------------------------------|-----------------|-----------------|
| <i>TAS2R1</i> | F: TGTGGTGGTGAATGGCATTG<br>R: CAGCACTTACTGTGGAGGAGGAAC                         | 813             | 813             |
| <i>TAS2R3</i> | F: ACACATGATTCAGGGATAATAATGCAAA<br>R: TTAGCCATCTTGGTTTTTGGTAGGAAATT            | 575             | 575             |
| <i>TAS2R4</i> | F: TACAGTGGTCAATTGCAAACTTGG<br>R: AATGTCCTGGAGAGTAAAGGGTGG                     | 749             | 749             |
| <i>TAS2R5</i> | F: TGGTCCTCATATAACCTCATTATCCTGG<br>R: CTGCCATGAGTGTCTCCCA                      | 667             | 667             |
| <i>TAS2R7</i> | F: TGTTTTATATTGGTGCTATATCCAGATGTCTATGC<br>R: GGATAAATGAATGACTTGAGGGGTAGATTAGAG | 658             | 658             |
| <i>TAS2R8</i> | F: CAATTTAGTTATCGCCAGAATTTGTTTGATC<br>R: TTATTTAAAACAATTAATAAAGTGAGTGACCCAAGG  | 723             | 723             |
| <i>TAS2R9</i> | F: TGAATTGACCATAGGGATTTGGG<br>R: ATAATTAGAATGAATGAATGGCTTGATGG                 | 807             | 807             |



|                |                                                               |     |     |
|----------------|---------------------------------------------------------------|-----|-----|
| <i>TAS2R10</i> | F: GACTTGTAAACTGCATTGACTGTGCC<br>R: AAAGAGGCTTGCTTTAGCTTGCTG  | 783 | 783 |
| <i>TAS2R13</i> | F: GGGTCAGTAAAAGAGAGCTGTCCTC<br>R: ATCAGAAGAAAGGAGTGGCTTGAAG  | 742 | 742 |
| <i>TAS2R14</i> | F: GCTTTGGCAATCTCTCGAATTAGC<br>R: CTCTAAATTCTTTGTGACCTGAGGGC  | 796 | 796 |
| <i>TAS2R16</i> | F: CCTGGGAATTTTTAATATCCTTACATTCTGGT<br>R: GAAGCGCGCTTTCATGCTT | 419 | 419 |
| <i>TAS2R19</i> | F: GGTTTACTCTGGGTGATGTTATTC<br>R: TTTGCTCTGCTGTGTCCTAAG       | 606 | 606 |
| <i>TAS2R20</i> | F: GCACTGATAAATTTTCATTGCCTGG<br>R: TTGTTCCCCCAAATCAGAATGAAT   | 770 | 770 |
| <i>TAS2R30</i> | F: GGTGTTATTACTACATTGGTATGCAACTC<br>R: AAGACAGGTTGCTTTTCCAGC  | 603 | 603 |
| <i>TAS2R31</i> | F: CATTGGTAAATTCCATTGAGC<br>R: GATATCATTATGGACAGAAAGTAAAC     | 661 | 661 |
| <i>TAS2R38</i> | F: ACAGTGATTGTGTGCTGCTG<br>R: GCTCTCCTCAACTTGGCATT            | 766 | 766 |
| <i>TAS2R39</i> | F: TGTCGCCATTTCTCATCACCTTA<br>R: ATTGAGTGGCTGGCAGGGTAG        | 841 | 841 |
| <i>TAS2R40</i> | F: AGAGTGCATCACTGGCCTCCTT<br>R: GAGGATGAGAAAGTAGCTGGTGGC      | 685 | 685 |
| <i>TAS2R41</i> | F: GGTTGCTGCCCTTGGATATGA<br>R: TGAAGATGAGGATGAAGGGATGG        | 738 | 738 |
| <i>TAS2R42</i> | F: ATGGCCACCGAATTGGACA<br>R: GCTTGCTGTTTCCCAGAATGAG           | 871 | 871 |
| <i>TAS2R43</i> | F: GGTCTCCAGAGTTGGTTTGC<br>R: TCTTGTTTCCCCAAATCAGG            | 698 | 698 |
| <i>TAS2R45</i> | F: CTCCTTTGCTGACCAAATTGTC<br>R: GAACGGGTGGGCTGAAGAAC          | 709 | 709 |
| <i>TAS2R46</i> | F: GAGTTGAATCCAGCTTTTAAC<br>R: ATAGCTGAATGCAATAGCTTC          | 606 | 606 |
| <i>TAS2R50</i> | F: GGTAATTTTCATTGACTGGGTGAAGAG<br>R: CCTTGCTAACCATGACAACCTGGG | 710 | 710 |
| <i>TAS2R60</i> | F: CAGGCAATGGCTTCATCACTG<br>R: TCCCACACCCAGAATTTAAAGTCC       | 748 | 748 |
| <i>ABL1</i>    | F: AGCATCTGACTTTGAGCC<br>R: CCCATTGTGATTATAGCCTAAGAC          | 793 | 193 |
| <i>KRT10</i>   | F: CCTTCGAAATGTGTCCACTGG<br>R: CAGGGATTGTTTCAAGGCCA           | —   | 290 |
| <i>GNAT3</i>   | F: TCTGGGTATGTGCCAAATGA<br>R: GGCCCAGTGTATTCTGGAAA            | —   | 386 |

123 The oligonucleotide sequences and the corresponding amplicon sizes are given for genomic  
124 DNA and cDNA. F, Forward; R, reverse; bp, base pairs.

## 125 **Quantitative PCR analysis**

126 To quantify mRNA abundance, qPCR was performed on each of the 25 *TAS2R* genes  
127 standardized to the housekeeping gene *GAPDH* (Fig 4). The results show variable expression of  
128 the *TAS2R* genes across samples, which was expected based on the results of the PCR  
129 amplification experiments. The taste tissue sample showed variable expression across receptor  
130 type. We also confirmed some expression of *GNAT3* in samples using qPCR standardized to the  
131 housekeeping gene *GAPDH* (Fig 4).

132 **Figure 4: Quantification of bitter taste-related gene expression—qPCR results from cDNA**  
133 **of skin samples after amplification for genes of interest.** cDNA was amplified with primers  
134 for *GNAT3*, *KRT10*, and the 25 *TAS2R* genes. Data were standardized to the housekeeping gene  
135 *GAPDH*, and  $2^{-\Delta\Delta C_t}$  was calculated. Results were plotted with individual values in gray and mean  
136 across all subjects in red ( $n = 9$ ). Data points for the FP sample are in blue.

137 Taste-related genes are minimally expressed even in taste tissue, and the results here were  
138 variable, as is the case with expression of mRNA near the level of detection [16]. Despite these  
139 limitations, these results suggested that a study of *TAS2R* mRNA expression in skin with a larger  
140 sample size was warranted. To do so, we turned to a large and publicly available RNA-seq data  
141 set.

## 142 **GTEx data analysis**

143           After appropriate approvals, we obtained RNA-seq expression data from the Genotype-  
144 Tissue Expression project (GTEx; #12732: Bitter receptor gene expression: patterns across  
145 tissues). The data were measured at the gene level in RPKM units (reads per kilobase of  
146 transcript per million mapped reads) and we extracted the expression data for 25 bitter receptor  
147 genes. The data analyzed consisted of 914 skin samples that varied in presumed sun exposure  
148 (sun-exposed from lower leg or not-sun-exposed from suprapubic region), sex, and age (Table  
149 1). This data set was used because RNA-seq provides more accurate detection of low-abundance  
150 transcripts and because it provided a large sample size. There was heterogeneity of variance  
151 between the *TAS2R* genes, but the most highly expressed bitter receptor genes were *TAS2R5*, *14*,  
152 *20*, and *4* (Fig 5). For statistical analysis of sun-exposure, we considered only subjects who had  
153 donated both sun-exposed and not sun-exposed tissue (n=299) and performed Kruskal-Wallis  
154 tests to detect differences in the distribution of gene expression levels based on sun-exposure.  
155 Results based on tissue type indicated significantly lower expression levels in sun-exposed skin  
156 for *TAS2R4* (Median diff.=0.084,  $p < 0.05$ ), *TAS2R30* (Median diff.=0.009,  $p<0.01$ ), and  
157 *TAS2R42* (Median diff=0,  $p < 0.05$ ), but significantly higher expression levels in sun-exposed  
158 skin for *TAS2R60* (Median diff=0.046,  $p<0.0001$ ) (Fig 6 and S1 Table). We also observed a  
159 small sex difference in mRNA expression. In skin from the suprapubic area, females' expression  
160 was significantly higher for *TAS2R3* (Median diff. = 0.034,  $p < 0.01$ ), *TAS2R4* (Median diff. =  
161 0.126,  $p < 0.01$ ), and *TAS2R8* (Median diff = 0,  $p < 0.05$ ) (Fig 7, S2 Table). In skin from the  
162 lower leg, females' expression was significantly lower for *TAS2R3* (Median diff. = 0.023,  $p <$   
163 0.05), *TAS2R9* (Median diff = 0,  $p < 0.01$ ), and *TAS2R14* (Median diff = 0.080,  $p < 0.01$ ) (Fig 7,

164 S3 Table). Finally, there was a positive correlation between increasing age and expression of  
165 *TAS2R5* gene but only in not-sun-exposed skin ( $p = 0.001$ ) (Fig 8).

166 **Figure 5: Expression levels of *TAS2R* genes from RNA-seq obtained from the GTEx**  
167 **database.** Data are plotted with individual RPKM values in gray points and mean across all  
168 samples in red lines ( $N = 914$ ).

169 **Figure 6: Effect of sun exposure on *TAS2R* expression from the GTEx data.** Expression  
170 levels of bitter receptor genes from RNA-seq obtained from the GTEx database are separated  
171 based on sun exposure. Data are plotted as mean and SD across subjects that donated both skin  
172 sample types ( $N = 299$  for each sample type). \* $p < 0.05$ , \*\* $p < 0.01$ , \*\*\* $p < 0.001$ ; \*\*\*\* $p < 0.0001$ .

173 **Figure 7: Effect of sex on *TAS2R* expression from the GTEx data.** Expression levels of bitter  
174 receptor genes from RNA-seq obtained from the GTEx database are separated based on sex and  
175 presumed sun exposure. Data are plotted as mean and SD across males ( $N = 603$ ) and females ( $N$   
176  $= 311$ ) that donated both skin sample types. \* $p < 0.05$ , \*\* $p < 0.01$ , \*\*\* $p < 0.001$ ; \*\*\*\* $p < 0.0001$ .

177 **Figure 8: Correlation plots of *TAS2R* expression against age from the GTEx data.**  
178 Individual RPKM data are plotted separated by sun exposure and in order of increasing age of  
179 the subject for each receptor. R values and p values are given on the corresponding plot.

## 180 **Discussion**

181 Previous studies have shown bitter taste receptor expression in many tissues, including  
182 the airway, gastrointestinal tract, and testes [2]. Here, we provide a comprehensive analysis of  
183 bitter taste receptor expression in skin using two types of skin samples and three methods of

184 analysis. This pattern of results suggests an association between *TAS2R* expression and  
185 chromosomal location. For instance, there is no expression of the *TAS2R* gene on chromosome 5  
186 and little to no expression of the first few *TAS2Rs* on chromosome 12. We found that some bitter  
187 receptors are not expressed at all, some are variably expressed among people, and some are  
188 expressed in almost all skin samples we tested. Variability in more highly expressed receptors is  
189 related to skin location (presumed-sun-exposed vs. non-exposed), sex, and age. Expression of  
190 taste-related gene *GNAT3* suggests that these receptors are functional in the skin and that the  
191 pathway may be G protein-dependent.

192         The role of bitter receptors in the skin may become apparent after exploring the most  
193 highly expressed receptors and their known agonists. Some T2R proteins are promiscuous and  
194 bind to a wide variety of substances, whereas others have more specificity and bind to one or a  
195 few known substances. The protein products of *TAS2R5* and *TAS2R20*, two of the most highly  
196 expressed genes in the GTEx data set, are narrowly tuned and recognize one to three of 104  
197 known bitter compounds [10]. T2R4, the product of *TAS2R4*, another highly expressed gene in  
198 this study, is intermediate and binds to 6–16 known bitter compounds. Finally, the *TAS2R14*  
199 product, T2R14 is broadly tuned and binds to 33 known bitter substances, including synthetic  
200 medicinal compounds [17, 18]. Interestingly, *TAS2R38*, the gene for the bitter receptor that  
201 enhances innate immunity of the upper respiratory system by recognizing bacteria [8], is rarely  
202 or never expressed in skin. We do not know whether the agonists for bitter receptors in skin are  
203 endogenous compounds, a pathogen product, or some other exogenous ligand. Further

204 experiments should investigate the cellular response in skin when exposed to compounds similar  
205 to known agonists of these bitter receptors to learn more about their potential functions.

206         Determining the cellular expression of T2R proteins in skin is an important next step.  
207 Bitter receptors are typically expressed in cells known to have chemosensory functions and these  
208 cell types are typically sparsely distributed (nose, gut, and tongue). Although we do not know  
209 which cell type in human skin expresses *TAS2R* mRNA, previous studies suggest that they may  
210 be in the epidermis, and potentially expressed by keratinocytes [10, 11]. There may also be  
211 previously uncharacterized cell types in human skin similar to solitary chemosensory cells that  
212 express bitter receptors [19], where we speculate that they may function in innate immunity,  
213 wound healing, and/or differentiation. Future studies should attempt to determine the localization  
214 of T2Rs in skin potentially through immunocytochemistry, which would require validating  
215 human T2R antibodies, or *in situ* mRNA hybridization.

## 216 **Materials and Methods**

### 217 **Sample collection and DNA/RNA extraction**

218         Staff at the University of Pennsylvania Department of Dermatology collected healthy skin  
219 from 15 Mohs surgery patients for this study (n = 4 female/11 male; mean age, 62 ± 11.24  
220 years). The Mohs procedure is used to remove cancerous skin and requires removal of additional  
221 healthy skin to facilitate proper closure of the wound [13]. We received this additional healthy  
222 skin on the day of its removal. The information obtained about each subject was provided by the  
223 department and is summarized in Table 1. Removal location was provided and based on that

224 information as well as the proximity to cancerous skin we presumed that all samples should be  
225 considered sun-exposed. We also obtained one FP biopsy from the tongue of a separate donor as  
226 a positive control for *TAS2R* expression. FP were removed from the surface of the tongue using  
227 curved spring micro-scissors [20]. The papillae and skin tissue (0.5 mg) were mechanically  
228 homogenized and DNA and RNA was extracted using the Zymo Duet DNA/RNA MiniPrep Plus  
229 kit, following the protocol for solid tissue. DNA and RNA was quantified with the Thermo  
230 Fisher Scientific NanoDrop 1000 Spectrophotometer and measured RNA degradation through  
231 RNA integrity number equivalents generated by the Agilent TapeStation and High Sensitivity  
232 ScreenTape Assay. The RNA underwent an extra DNase treatment using the Thermo Fisher  
233 TURBO DNA-free Kit; RNA (100ng) in water (5  $\mu$ L) was then reverse transcribed into cDNA  
234 using the NuGEN Ovation RNA Amplification System V2 protocol, purified with the QIAquick  
235 PCR Purification Kit, and again quantified. The Institutional Review Board at the University of  
236 Pennsylvania approved the collection of skin biopsies for this use.

## 237 **Primers and PCR amplification**

238         Primer sets for *KRT10* and *GNAT3* were designed using the NCBI Primer-BLAST tool.  
239 The *ABLI* primers are designed to span introns, leading to expected bands at 793 base pairs for  
240 genomic DNA and 193 base pairs for cDNA[12]. Primer sets for all 25 *TAS2R* genes have been  
241 previously published [11]. PCR reactions using primers listed in Table 2 (Invitrogen, Carlsbad,  
242 CA, USA) were performed according to the Invitrogen™ Platinum™ Taq Green Hot Start DNA  
243 Polymerase protocol with a 1  $\mu$ L template. The total amount of genomic DNA from each sample

244 was 10 ng, and the total amount of cDNA from each sample was 50 ng. A StepOne  
245 Thermocycler was used according to the following profile: one cycle of 4 min at 94 °C; 40 cycles  
246 of 1 min at 94 °C, 1 min at 55 °C, 2 min at 72 °C; one cycle of a final hold at 4 °C. Fragments  
247 were detected by staining with SYBR Green Safe. The PCR products were electrophoresed on a  
248 1.0% gel in TAE buffer.

### 249 **Real-time qPCR**

250 Real Time qPCR reactions were performed in 10 µL of water in a 384-well plate according to  
251 the TaqMan<sup>®</sup> Fast Advanced Master Mix protocol with 1 µL template and run in triplicate. The  
252 total amount of cDNA from each sample was 50 ng. Primers for skin-specific markers, *TAS2Rs*,  
253 and a pre-developed endogenous control, *GAPDH* were used. PCR reactions were performed  
254 with the QuantStudio 12K Flex Real-Time PCR machine and amplification was evaluated by  
255 comparative analysis based on cycle threshold [21]. Graphs were generated using GraphPad  
256 Prism 7 (La Jolla, CA, USA).

### 257 **GTEx database analysis**

258 RNA-seq data from 914 post-mortem tissue samples were provided by the GTEx project  
259 (Table 1), with information about each sample, including the age and sex of the tissue donor, and  
260 tissue type (sun-exposed skin from lower leg or sun-unexposed skin from suprapubic region).  
261 For the 25 bitter receptor genes from 914 samples, the gene expression RPKM values were  
262 normalized for all samples of the same tissue type. Due to the heterogeneity of variance between  
263 the genes, we used the non-parametric Kruskal-Wallis test to detect differences in the



264 distribution of expression levels based on effects of sun exposure and of sex within each tissue  
265 type (S1-3 Tables). For analysis of effects of sun exposure, only data from the 299 subjects that  
266 donated both types of samples were included. For effects of sex in skin from the lower leg, all  
267 508 tissue samples were included, and from the suprapubic area, all 406 tissue samples were  
268 included. Data for sun exposure effects and sex were analyzed in R version 3.4.2, and graphs  
269 were generated in GraphPad Prism 7. Effects of age were analyzed via correlation and plotted in  
270 R (version 3.4.2) and R-studio (version 1.0.136). We deposited a data analysis script based in R  
271 on Github (<https://github.com/DanielleReed/TAS2R38>).

## 272 **Acknowledgments**

273 Dr. Aimee Payne and the staff at the University of Pennsylvania Department of Dermatology are  
274 acknowledged for providing samples and technical assistance. We are thankful to Dr. Casey  
275 Trimmer for sharing her expertise and providing advice for the study. Dr. Mary Matsui, and Dr.  
276 Ed Pelle from the Estée Lauder Companies are also acknowledged for their contribution to our  
277 preliminary work and for their insight on the study. We are grateful to Nora Ruth from The Estée  
278 Lauder Companies for revising the manuscript.

279

## 280 **References**

- 281  
282 1. Reed DR, Knaapila A. Genetics of taste and smell: poisons and pleasures. *Prog Mol Biol*  
283 *Transl Sci.* 2010;94:213-40. Epub 2010/11/03. doi: B978-0-12-375003-7.00008-X [pii]  
284 10.1016/B978-0-12-375003-7.00008-X. PubMed PMID: 21036327; PubMed Central PMCID:  
285 PMCPMC3342754.
- 286 2. Lee RJ, Cohen NA. Taste receptors in innate immunity. *Cell Mol Life Sci.*  
287 2015;72(2):217-36. doi: 10.1007/s00018-014-1736-7. PubMed PMID: 25323130; PubMed  
288 Central PMCID: PMCPMC4286424.
- 289 3. Zheng K, Lu P, Delpapa E, Bellve K, Deng R, Condon JC, et al. Bitter taste receptors as  
290 targets for tocolytics in preterm labor therapy. *FASEB J.* 2017;31(9):4037-52. doi:  
291 10.1096/fj.201601323RR. PubMed PMID: 28559440; PubMed Central PMCID:  
292 PMCPMC5572693.
- 293 4. Shah AS, Ben-Shahar Y, Moninger TO, Kline JN, Welsh MJ. Motile cilia of human  
294 airway epithelia are chemosensory. *Science.* 2009;325:1131-4. PubMed PMID: 19628819.
- 295 5. Janssen S, Laermans J, Verhulst PJ, Thijs T, Tack J, Depoortere I. Bitter taste receptors  
296 and -gustducin regulate the secretion of ghrelin with functional effects on food intake and  
297 gastric emptying. *Proc Natl Acad Sci USA.* 2011. doi: 10.1073/pnas.1011508108.
- 298 6. Foster SR, Porrello ER, Purdue B, Chan HW, Voigt A, Frenzel S, et al. Expression,  
299 regulation and putative nutrient-sensing function of taste GPCRs in the heart. *PloS One.*  
300 2013;8(5):e64579. Epub 2013/05/23. doi: 10.1371/journal.pone.0064579. PubMed PMID:  
301 23696900; PubMed Central PMCID: PMC3655793.
- 302 7. Jang HJ, Kokrashvili Z, Theodorakis MJ, Carlson OD, Kim BJ, Zhou J, et al. Gut-  
303 expressed gustducin and taste receptors regulate secretion of glucagon-like peptide-1. *Proc Natl*  
304 *Acad Sci USA.* 2007;104(38):15069-74. PubMed PMID: 17724330.
- 305 8. Lee RJ, Xiong G, Kofonow JM, Chen B, Lysenko A, Jiang P, et al. T2R38 taste receptor  
306 polymorphisms underlie susceptibility to upper respiratory infection. *J Clin Invest.*  
307 2012;122(11):4145-59. Epub 2012/10/09. doi: 10.1172/JCI64240. PubMed PMID: 23041624;  
308 PubMed Central PMCID: PMCPMC3484455.
- 309 9. Denda M. Newly discovered olfactory receptors in epidermal keratinocytes are associated  
310 with proliferation, migration, and re-epithelialization of keratinocytes. *J Invest Dermatol.*  
311 2014;134(11):2677-9. doi: 10.1038/jid.2014.229. PubMed PMID: 25318430.
- 312 10. Wolfle U, Elsholz FA, Kersten A, Haarhaus B, Muller WE, Schempp CM. Expression  
313 and functional activity of the bitter taste receptors TAS2R1 and TAS2R38 in human  
314 keratinocytes. *Skin Pharmacol Physiol.* 2015;28(3):137-46. doi: 10.1159/000367631. PubMed  
315 PMID: 25573083.
- 316 11. Ewa Nowakowska ER. Expression of bitter taste receptors in the human skin in vitro.  
317 *Journal of Clinical Research and Bioethics.* 2015;6(2).

- 318 12. Lion T. Appropriate controls for RT-PCR. *Leukemia*. 1996;10(11):1843. PubMed PMID:  
319 8892692.
- 320 13. Cotel WI, Proper S. Mohs' surgery, fresh-tissue technique. Our technique with a review.  
321 *J Dermatol Surg Oncol*. 1982;8(7):576-87. PubMed PMID: 6181110.
- 322 14. Edqvist PH, Fagerberg L, Hallstrom BM, Danielsson A, Edlund K, Uhlen M, et al.  
323 Expression of human skin-specific genes defined by transcriptomics and antibody-based  
324 profiling. *J Histochem Cytochem*. 2015;63(2):129-41. doi: 10.1369/0022155414562646.  
325 PubMed PMID: 25411189; PubMed Central PMCID: PMCPMC4305515.
- 326 15. Tracy LE, Minasian RA, Caterson EJ. Extracellular matrix and dermal fibroblast function  
327 in the healing wound. *Adv Wound Care (New Rochelle)*. 2016;5(3):119-36. doi:  
328 10.1089/wound.2014.0561. PubMed PMID: 26989578; PubMed Central PMCID:  
329 PMCPMC4779293.
- 330 16. Behrens M, Foerster S, Staehler F, Raguse JD, Meyerhof W. Gustatory expression  
331 pattern of the human TAS2R bitter receptor gene family reveals a heterogenous population of  
332 bitter responsive taste receptor cells. *J Neurosci*. 2007;27(46):12630-40. PubMed PMID:  
333 18003842.
- 334 17. Lossow K, Hubner S, Roudnitzky N, Slack JP, Pollastro F, Behrens M, et al.  
335 Comprehensive analysis of mouse bitter taste receptors reveals different molecular receptive  
336 ranges for orthologous receptors in mice and humans. *J Biol Chem*. 2016. doi:  
337 10.1074/jbc.M116.718544. PubMed PMID: 27226572.
- 338 18. Meyerhof W, Batram C, Kuhn C, Brockhoff A, Chudoba E, Bufe B, et al. The molecular  
339 receptive ranges of human TAS2R bitter taste receptors. *Chem Senses*. 2010;35(2):157-70.  
340 PubMed PMID: 20022913.
- 341 19. Tizzano M, Gulbransen BD, Vandenbeuch A, Clapp TR, Herman JP, Sibhatu HM, et al.  
342 Nasal chemosensory cells use bitter taste signaling to detect irritants and bacterial signals. *Proc*  
343 *Natl Acad Sci USA*. 2010;107:3210-5. PubMed PMID: 20133764.
- 344 20. Spielman AI, Pepino MY, Feldman R, Brand JG. Technique to collect fungiform (taste)  
345 papillae from human tongue. *J Vis Exp*. 2010;18(42):2201. . Epub 2010/10/26. doi:  
346 10.3791/2201. PubMed PMID: 20972388; PubMed Central PMCID: PMC3168239.
- 347 21. Livak KJ, Schmittgen TD. Analysis of relative gene expression data using real-time  
348 quantitative PCR and the 2<sup>-</sup>(Delta Delta C(T)) Method. *Methods*. 2001;25(4):402-8. PubMed  
349 PMID: 11846609.
- 350

## 352 Supporting Information

353 **S1 Figure: Gene expression of *ABLI*.** PCR was performed with genomic DNA from skin  
354 (gDNA), a mixture of genomic DNA and cDNA from skin (Mix), cDNA from fungiform  
355 papillae (FP), and cDNA from 14 skin samples (001-015). Water was used as a no-template  
356 control. The larger band at 793 base pairs (bp) includes introns, and the smaller band at 293 bp  
357 does not contain introns. Genomic DNA was used as a positive control for the larger band size.  
358 A mix was used as a positive control for both bands. The smear at FP is likely caused by  
359 nonspecific binding.

360 **S2 Figure: Gene expression of *TAS2R1*.** PCR was performed with genomic DNA from skin  
361 (gDNA), cDNA from fungiform papillae (FP), and cDNA from nine skin samples. Water was  
362 used as a no-template control. The expected band size is 813 bp. The experiment was replicated  
363 (bottom panel) because taste receptors are not abundant and can have variable results.

364 **S3 Figure: Gene expression of *TAS2R3*.** PCR was performed with genomic DNA from skin  
365 (gDNA), cDNA from fungiform papillae (FP), and cDNA from nine skin samples. Water was  
366 used as a no-template control. The expected band size is 575 bp. The experiment was replicated  
367 (bottom panel) because taste receptors are not abundant and can have variable results.

368 **S4 Figure: Gene expression of *TAS2R4*.** PCR was performed with genomic DNA from skin  
369 (gDNA), cDNA from fungiform papillae (FP), and cDNA from nine skin samples. Water was  
370 used as a no-template control. The expected band size is 749 bp. The experiment was replicated  
371 (bottom panel) because taste receptors are not abundant and can have variable results.

372 **S5 Figure: Gene expression of *TAS2R5*.** PCR was performed with genomic DNA from skin  
373 (gDNA), cDNA from fungiform papillae (FP), and cDNA from nine skin samples. Water was  
374 used as a no-template control. The expected band size is 667 bp. The experiment was replicated  
375 (bottom panel) because taste receptors are not abundant and can have variable results.

376 **S6 Figure: Gene expression of *TAS2R7*.** PCR was performed with genomic DNA from skin  
377 (gDNA), cDNA from fungiform papillae (FP), and cDNA from nine skin samples. Water was  
378 used as a no-template control. The expected band size is 658 bp. The experiment was replicated  
379 (bottom panel) because taste receptors are not abundant and can have variable results.

380 **S7 Figure: Gene expression of *TAS2R8*.** PCR was performed with genomic DNA from skin  
381 (gDNA), cDNA from fungiform papillae (FP), and cDNA from nine skin samples. Water was  
382 used as a no-template control. The expected band size is 723 bp. The experiment was replicated  
383 (bottom panel) because taste receptors are not abundant and can have variable results.

384 **S8 Figure: Gene expression of *TAS2R9*.** PCR was performed with genomic DNA from skin  
385 (gDNA), cDNA from fungiform papillae (FP), and cDNA from nine skin samples. Water was  
386 used as a no-template control. The expected band size is 807 bp. The experiment was replicated  
387 (bottom panel) because taste receptors are not abundant and can have variable results.

388 **S9 Figure: Gene expression of *TAS2R10*.** PCR was performed with genomic DNA from skin  
389 (gDNA), cDNA from fungiform papillae (FP), and cDNA from nine skin samples. Water was  
390 used as a no-template control. The expected band size is 783 bp. The experiment was replicated  
391 (bottom panel) because taste receptors are not abundant and can have variable results.

392 **S10 Figure: Gene expression of *TAS2R13*.** PCR was performed with genomic DNA from skin  
393 (gDNA), cDNA from fungiform papillae (FP), and cDNA from nine skin samples. Water was  
394 used as a no-template control. The expected band size is 742 bp. The experiment was replicated  
395 (bottom panel) because taste receptors are not abundant and can have variable results.

396 **S11 Figure: Gene expression of *TAS2R14*.** PCR was performed with genomic DNA from skin  
397 (gDNA), cDNA from fungiform papillae (FP), and cDNA from nine skin samples. Water was  
398 used as a no-template control. The expected band size is 796 bp. The experiment was replicated  
399 (bottom panel) because taste receptors are not abundant and can have variable results.

400 **S12 Figure: Gene expression of *TAS2R16*.** PCR was performed with genomic DNA from skin  
401 (gDNA), cDNA from fungiform papillae (FP), and cDNA from nine skin samples. Water was  
402 used as a no-template control. The expected band size is 419 bp. The experiment was replicated  
403 (bottom panel) because taste receptors are not abundant and can have variable results.

404 **S13 Figure: Gene expression of *TAS2R19*.** PCR was performed with genomic DNA from skin  
405 (gDNA), cDNA from fungiform papillae (FP), and cDNA from nine skin samples. Water was  
406 used as a no-template control. The expected band size is 606 bp. The experiment was replicated  
407 (bottom panel) because taste receptors are not abundant and can have variable results.

408 **S14 Figure: Gene expression of *TAS2R20*.** PCR was performed with genomic DNA from skin  
409 (gDNA), cDNA from fungiform papillae (FP), and cDNA from nine skin samples. Water was  
410 used as a no-template control. The expected band size is 770 bp. The experiment was replicated  
411 (bottom panel) because taste receptors are not abundant and can have variable results.

412 **S15 Figure: Gene expression of *TAS2R30*.** PCR was performed with genomic DNA from skin  
413 (gDNA), cDNA from fungiform papillae (FP), and cDNA from nine skin samples. Water was  
414 used as a no-template control. The expected band size is 603 bp. The experiment was replicated  
415 (bottom panel) because taste receptors are not abundant and can have variable results.

416 **S16 Figure: Gene expression of *TAS2R31*.** PCR was performed with genomic DNA from skin  
417 (gDNA), cDNA from fungiform papillae (FP), and cDNA from nine skin samples. Water was  
418 used as a no-template control. The expected band size is 661 bp. The experiment was replicated  
419 (bottom panel) because taste receptors are not abundant and can have variable results.

420 **S17 Figure: Gene expression of *TAS2R38*.** PCR was performed with genomic DNA from skin  
421 (gDNA), cDNA from fungiform papillae (FP), and cDNA from nine skin samples. Water was  
422 used as a no-template control. The expected band size is 766 bp. Multiple bands are likely  
423 because of non-specific binding. The experiment was replicated (bottom panel) because taste  
424 receptors are not abundant and can have variable results.

425 **S18 Figure: Gene expression of *TAS2R39*.** PCR was performed with genomic DNA from skin  
426 (gDNA), cDNA from fungiform papillae (FP), and cDNA from nine skin samples. Water was  
427 used as a no-template control. The expected band size is 841 bp. The experiment was replicated,  
428 but results were omitted because of non-specific binding.

429 **S19 Figure: Gene expression of *TAS2R40*.** PCR was performed with genomic DNA from skin  
430 (gDNA), cDNA from fungiform papillae (FP), and cDNA from nine skin samples. Water was  
431 used as a no-template control. The expected band size is 685 bp. The experiment was replicated  
432 (bottom panel) because taste receptors are not abundant and can have variable results.

433 **S20 Figure: Gene expression of *TAS2R41*.** PCR was performed with genomic DNA from skin  
434 (gDNA), cDNA from fungiform papillae (FP), and cDNA from nine skin samples. Water was  
435 used as a no-template control. The expected band size is 738 bp. Multiple bands are likely  
436 because of non-specific binding. The experiment was replicated (bottom panel) because taste  
437 receptors are not abundant and can have variable results.

438 **S21 Figure: Gene expression of *TAS2R42*.** PCR was performed with genomic DNA from skin  
439 (gDNA), cDNA from fungiform papillae (FP), and cDNA from nine skin samples. Water was  
440 used as a no-template control. The expected band size is 871 bp. The experiment was replicated  
441 (bottom panel) because taste receptors are not abundant and can have variable results.

442 **S22 Figure: Gene expression of *TAS2R43*.** PCR was performed with genomic DNA from skin  
443 (gDNA), cDNA from fungiform papillae (FP), and cDNA from nine skin samples. Water was  
444 used as a no-template control. The expected band size is 698 bp. The experiment was replicated  
445 (bottom panel) because taste receptors are not abundant and can have variable results.

446 **S23 Figure: Gene expression of *TAS2R45*.** PCR was performed with genomic DNA from skin  
447 (gDNA), cDNA from fungiform papillae (FP), and cDNA from nine skin samples. Water was  
448 used as a no-template control. The expected band size is 709 bp. Multiple bands are likely  
449 because of non-specific binding. The experiment was replicated (bottom panel) because taste  
450 receptors are not abundant and can have variable results.

451 **S24 Figure: Gene expression of *TAS2R46*.** PCR was performed with genomic DNA from skin  
452 (gDNA), cDNA from fungiform papillae (FP), and cDNA from nine skin samples. Water was



453 used as a no-template control. The expected band size is 606 bp. The experiment was replicated  
454 (bottom panel) because taste receptors are not abundant and can have variable results.

455 **S25 Figure: Gene expression of *TAS2R50*.** PCR was performed with genomic DNA from skin  
456 (gDNA), cDNA from fungiform papillae (FP), and cDNA from nine skin samples. Water was  
457 used as a no-template control. The expected band size is 710 bp. The experiment was replicated  
458 (bottom panel) because taste receptors are not abundant and can have variable results.

459 **S26 Figure: Gene expression of *TAS2R60*.** PCR was performed with genomic DNA from skin  
460 (gDNA), cDNA from fungiform papillae (FP), and cDNA from nine skin samples. Water was  
461 used as a no-template control. The expected band size is 748 bp. The experiment was replicated  
462 (bottom panel) because taste receptors are not abundant and can have variable results.

463 **S27 Figure: Gene expression of *GNAT3*.** PCR was performed with genomic DNA from skin  
464 (gDNA), cDNA from fungiform papillae (FP), and cDNA from nine skin samples. Water was  
465 used as a no-template control. The primer set is intron-spanning, so there is no expected band  
466 size for genomic DNA, while there is an expected band size of 386 bp for cDNA. The  
467 experiment was replicated (bottom panel) because taste receptors are not abundant and can have  
468 variable results.

469 **S28 Figure: Gene expression of *KRT10*.** PCR was performed with genomic DNA from skin  
470 (gDNA), cDNA from fungiform papillae (FP), and cDNA from nine skin samples. Water was  
471 used as a no-template control. The primer set is intron-spanning, so there is no expected band  
472 size for genomic DNA and an expected band size of 290 bp for cDNA. The experiment was  
473 replicated (bottom panel) because taste receptors are not abundant and can have variable results.

474 **S1 Table.** Kruskal-Wallis test statistics for GTEx data comparing effects of presumed sun

475 exposure for each gene of interest (N=598).

476 **S2 Table.** Kruskal-Wallis test statistics for GTEx data comparing effects of sex for each gene of

477 interest in not sun-exposed tissue (N=406).

478 **S3 Table.** Kruskal-Wallis test statistics for GTEx data comparing effects of sex for each gene of

479 interest in sun-exposed tissue (N=508).

Chromosome 5

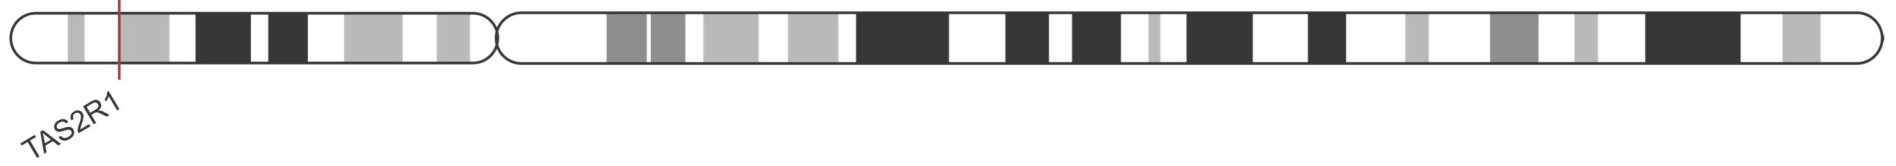

Chromosome 7

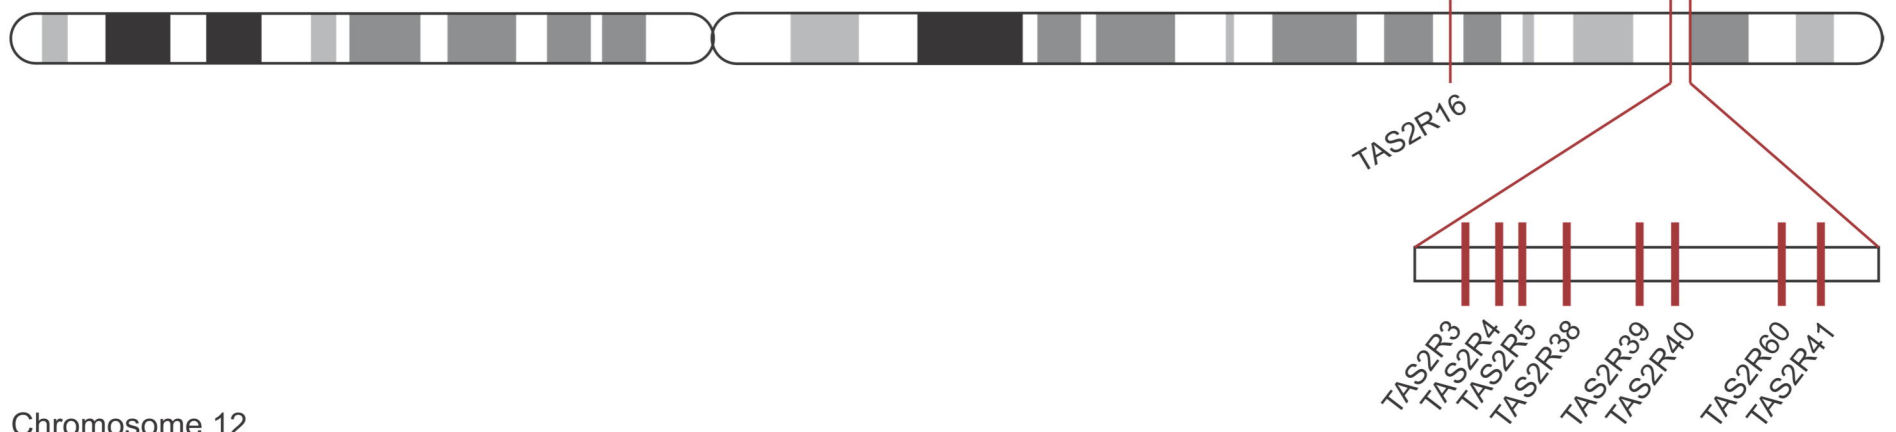

Chromosome 12

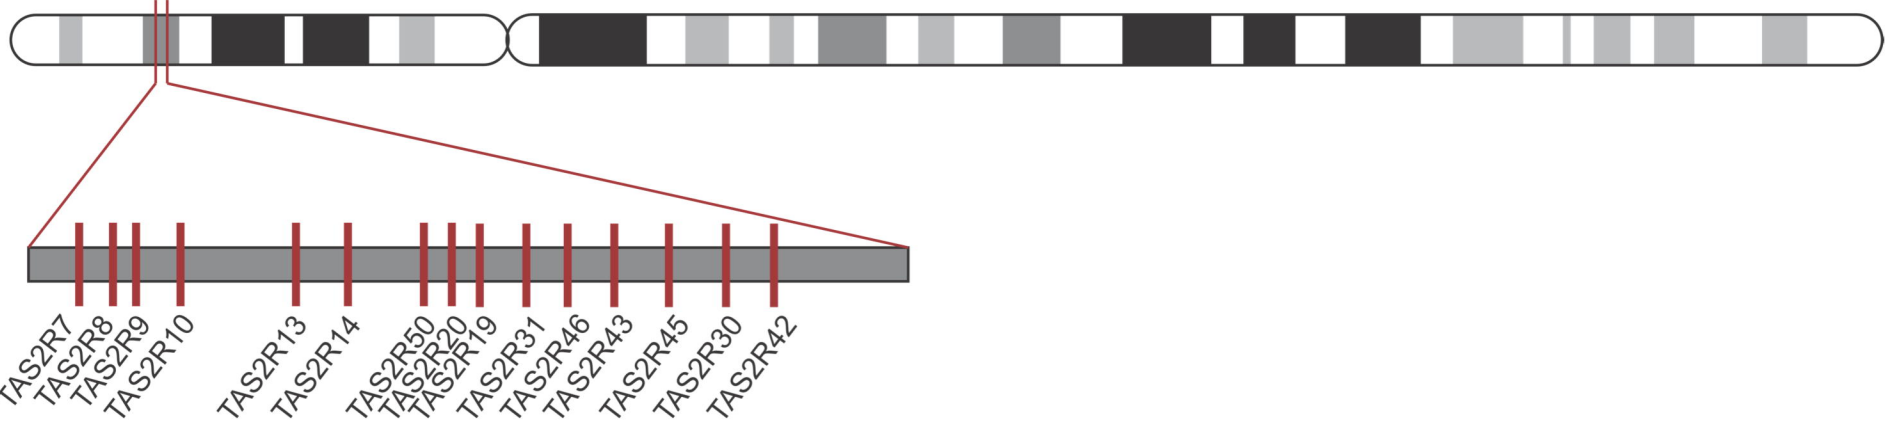

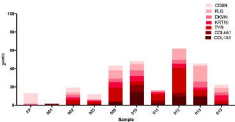

| Location  | Cell Type    | Enriched in layer:  | Marker |
|-----------|--------------|---------------------|--------|
| Epidermis | Cornocyte    | Stratum corneum     | CTSH   |
|           | Keratinocyte | Stratum granulosum  | FLG    |
|           | Keratinocyte | Stratum spinosum    | DKMN   |
|           | Keratinocyte | All but basal layer | KRT10  |
|           | Melanocyte   | Stratum basale      | TYR    |
| Dermis    | Collagen     | Dermis papillary    | COL6A1 |
|           | Collagen     | Dermis reticularis  | COL1A1 |

**GNAT3**  
**KRT10**  
**TAS2R1**  
**TAS2R16**  
**TAS2R3**  
**TAS2R4**  
**TAS2R5**  
**TAS2R38**  
**TAS2R39 \***  
**TAS2R40**  
**TAS2R60**  
**TAS2R41**  
**TAS2R7**  
**TAS2R8**  
**TAS2R9**  
**TAS2R10**  
**TAS2R13**  
**TAS2R14**  
**TAS2R50**  
**TAS2R20**  
**TAS2R19**  
**TAS2R31**  
**TAS2R46**  
**TAS2R43**  
**TAS2R45**  
**TAS2R30**  
**TAS2R42**

**gDNA**

**FP**

**001**

**002**

**003**

**008**

**010**

**011**

**012**

**013**

**015**

**W**

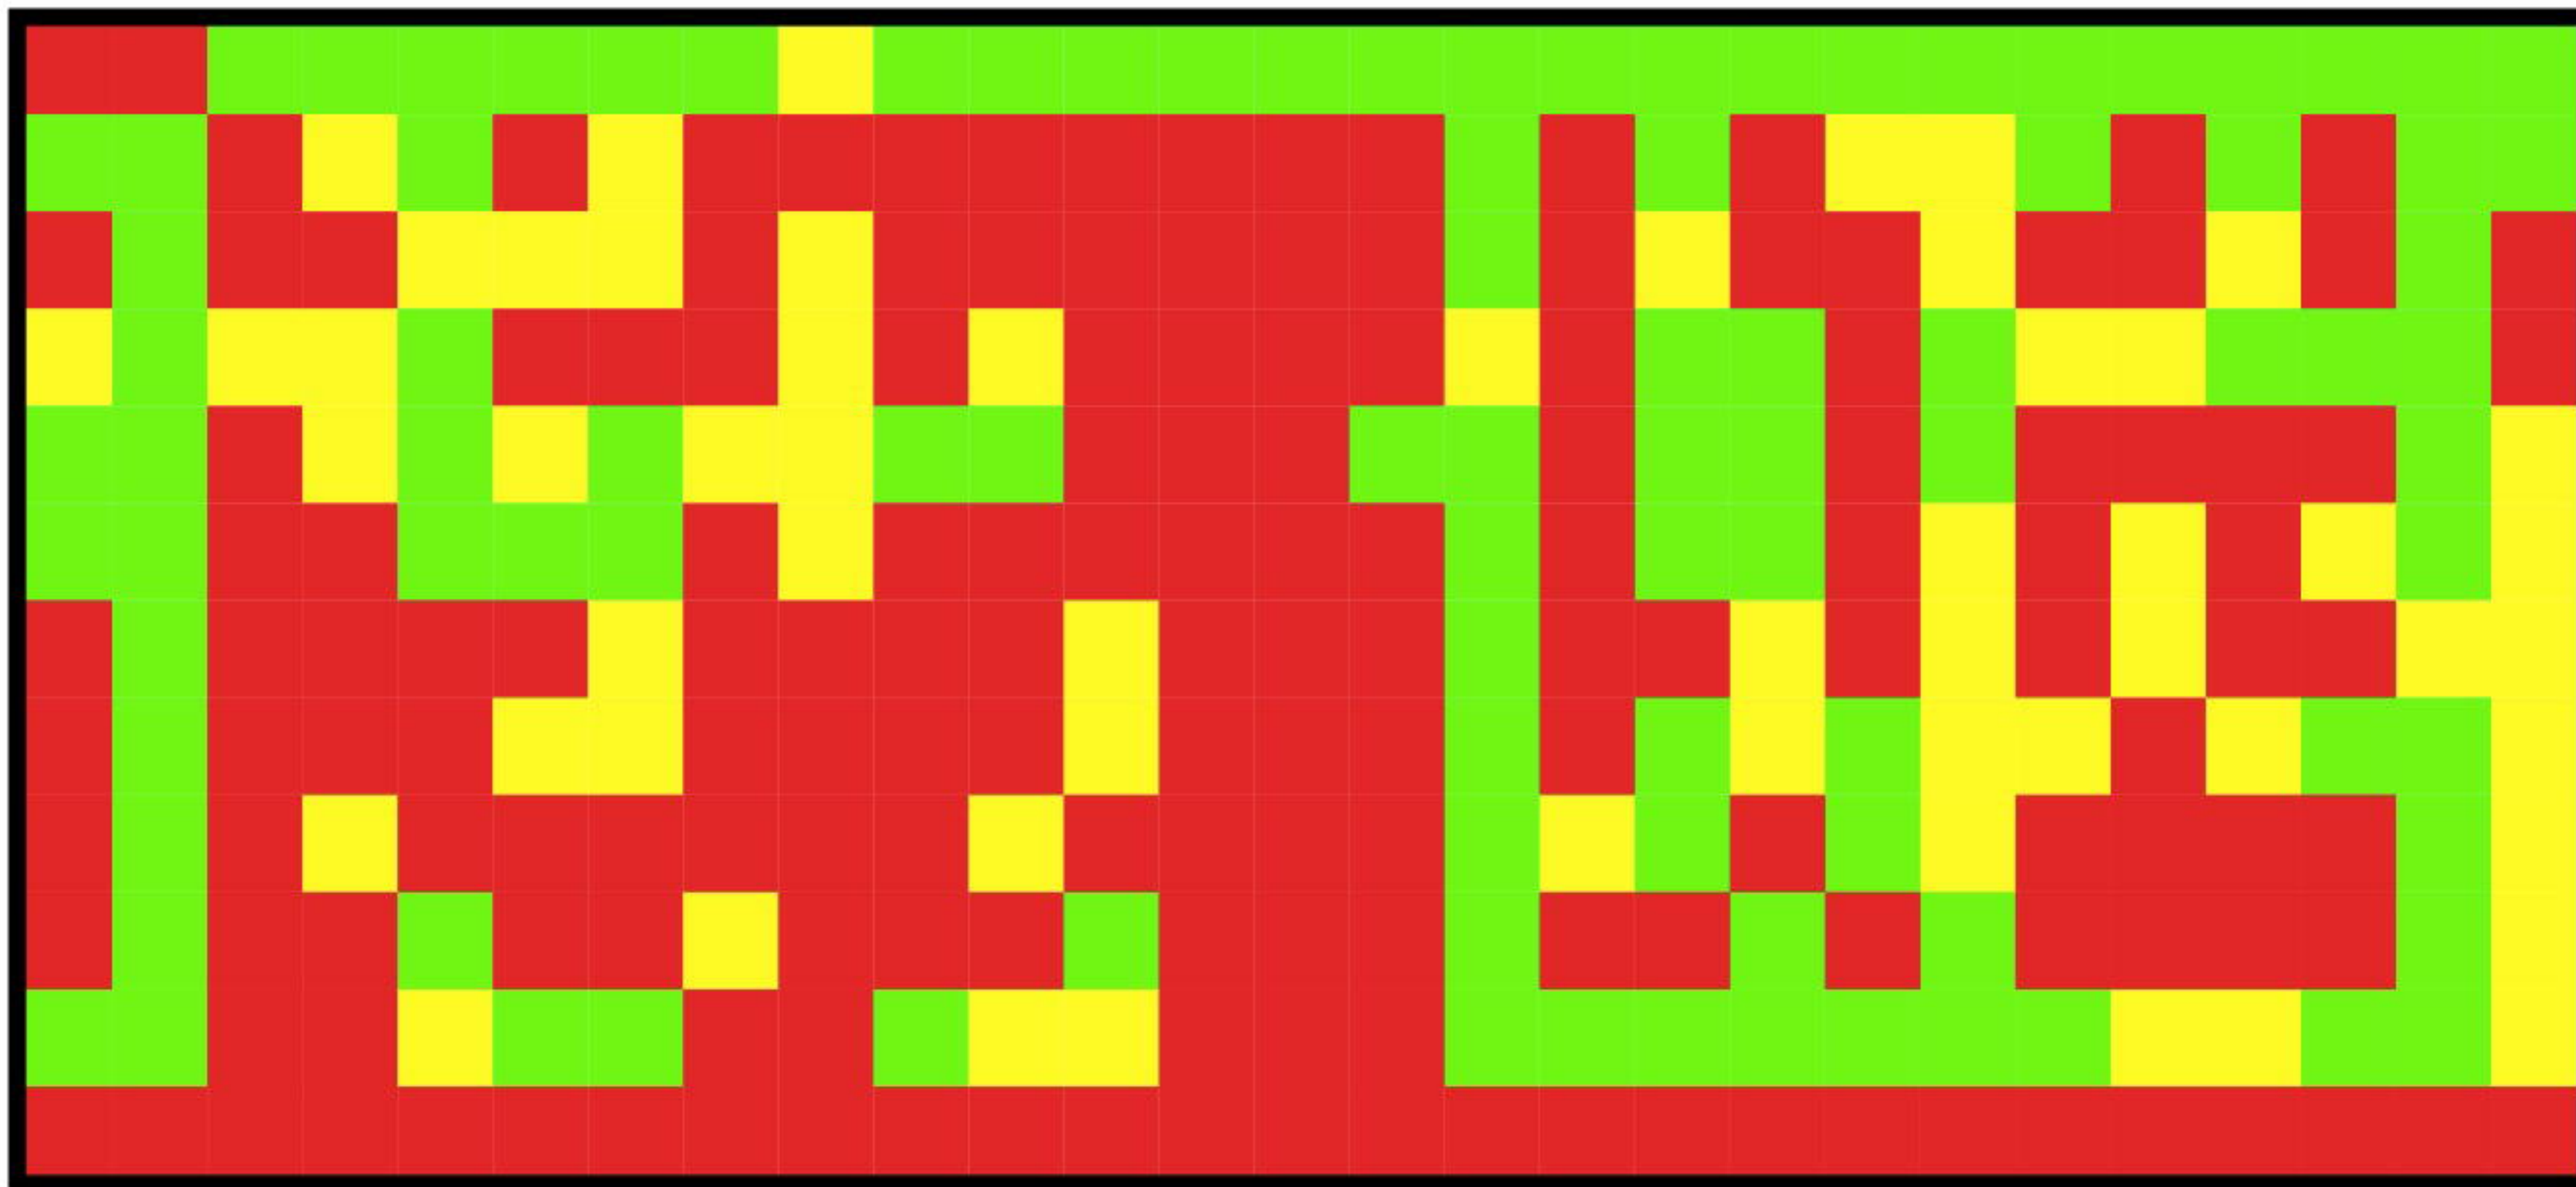

**2**

**1**

**0**



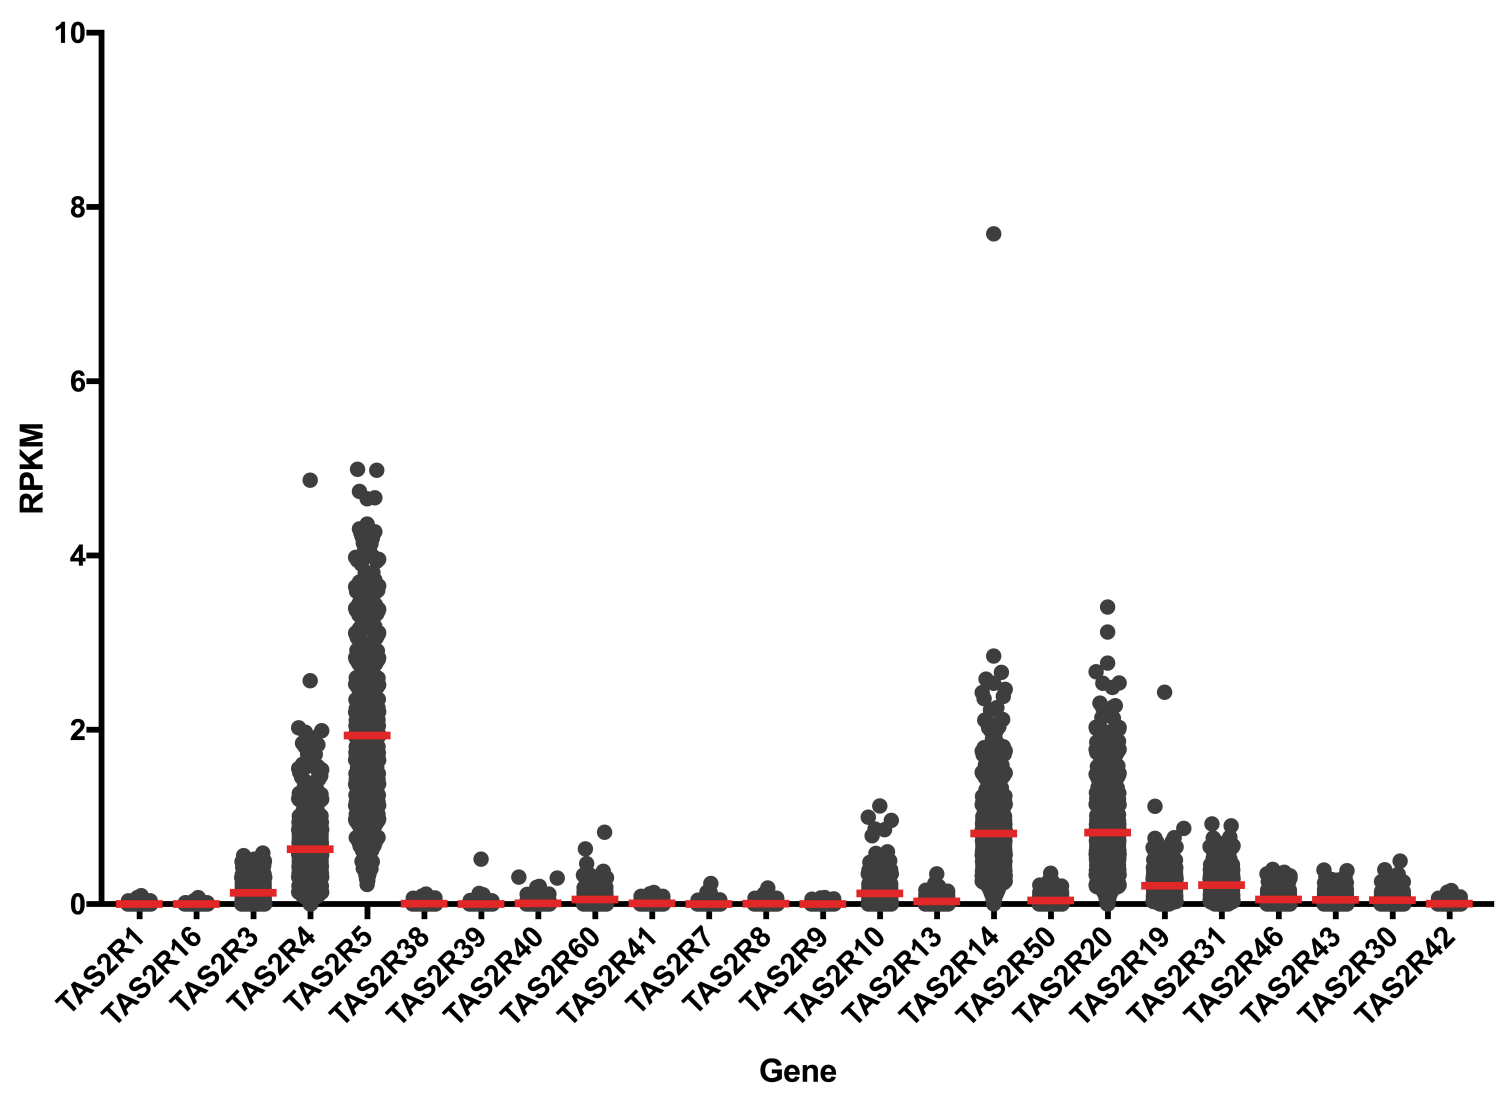

# Sun Exposure

- Sun-Exposed (Lower Leg)
- Not Sun-Exposed (Suprapubic)

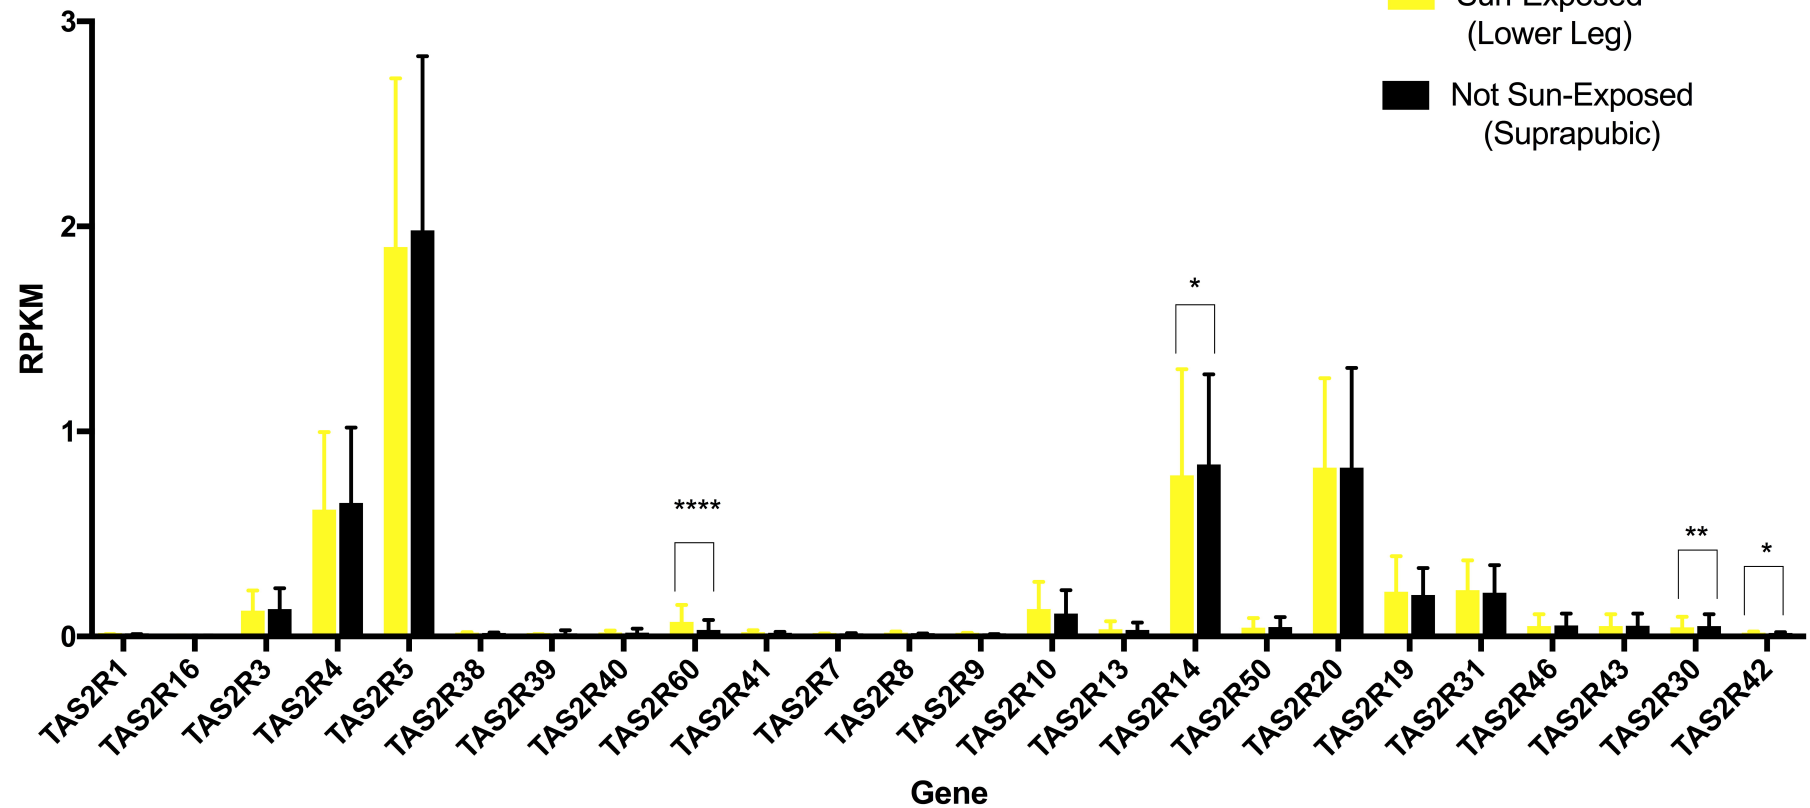



Not Sun-Exposed (Suprapubic)

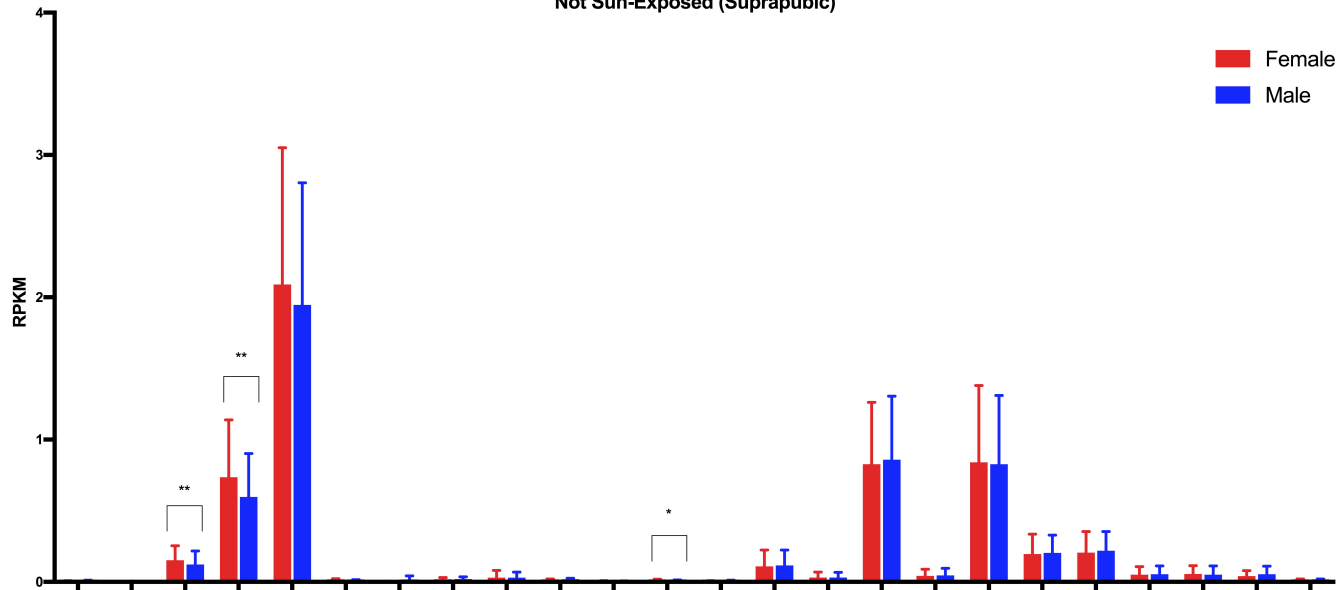

Sun-Exposed (Lower leg)

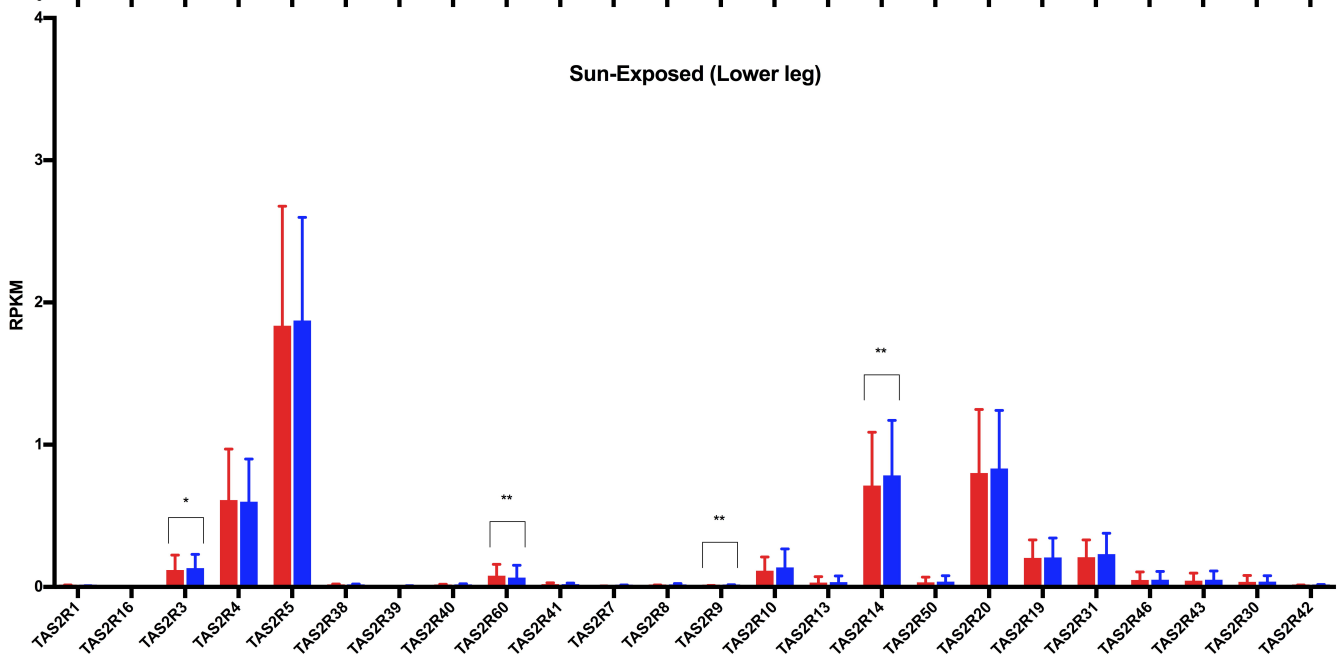

**A**

## Skin - Not Sun Exposed (Suprapubic)

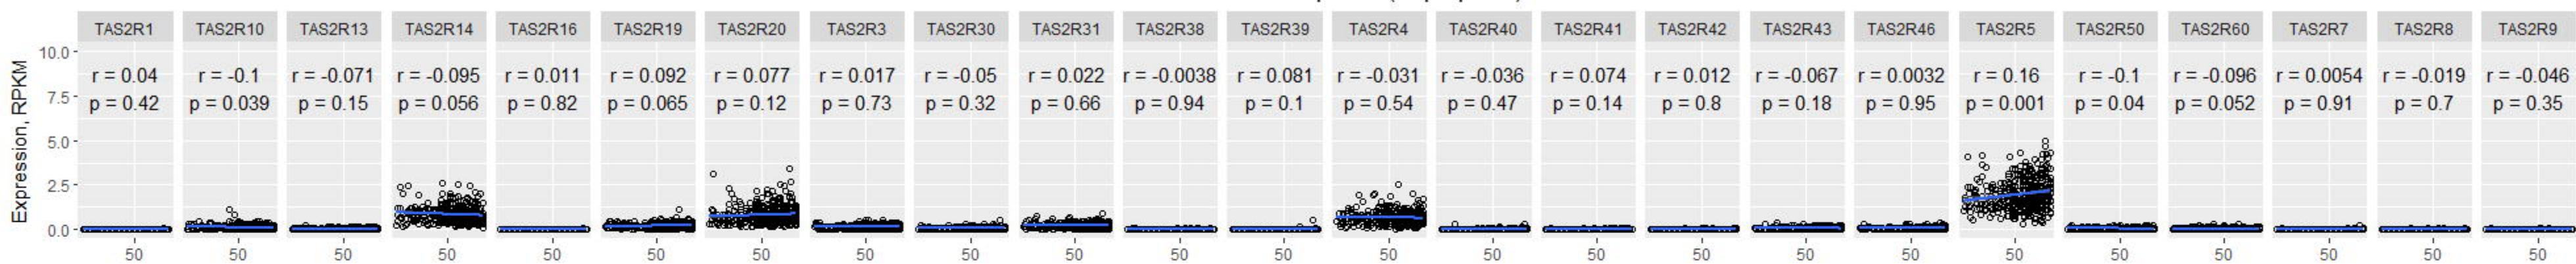**B**

## Skin - Sun Exposed (Lower leg)

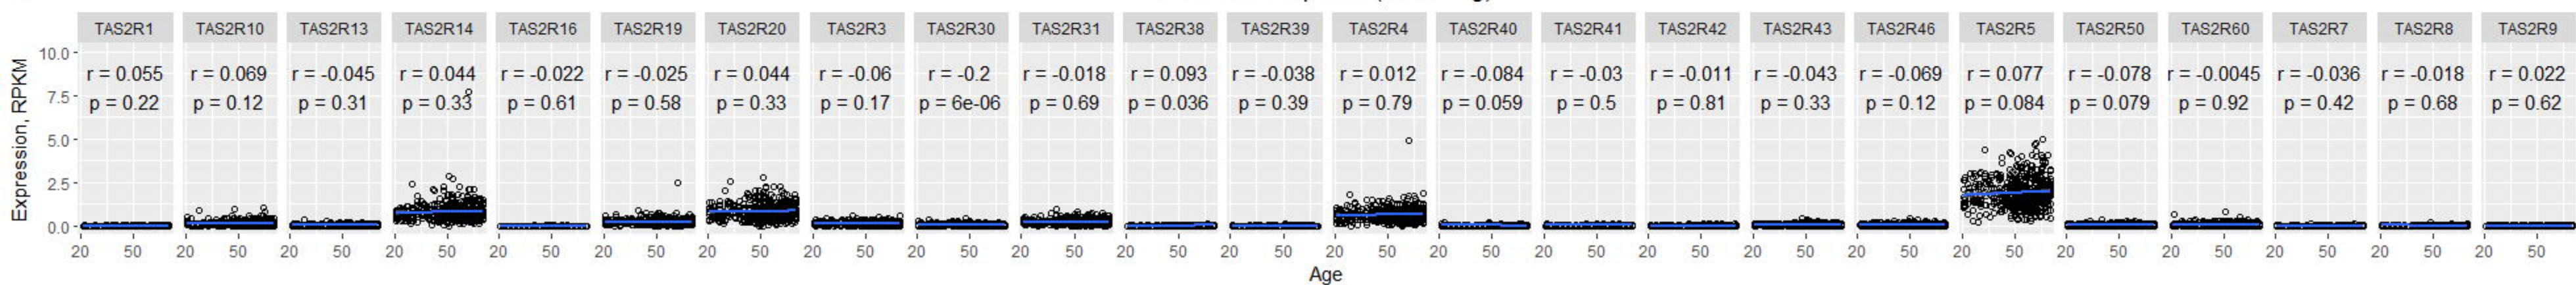

Source: https://www.biorxiv.org/content/10.1101/364901v1.full.pdf
